# Supplementary material
Source: Springer Nature journal article supplement (https://www.springermedizin.de/resource/supplementary/12891_2007_523_MOESM1_ESM.pdf/9511230)

(BL to Wk8) **OAK program** n = 76

6 Months n = 74

Baseline n = 79

Week 8 n = 76

12 Months n = 68

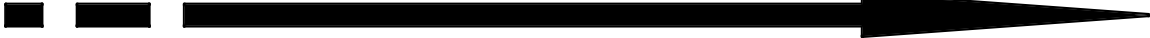

Supplement: MOESM1 [file 9511230]
